# Supplementary material for: Identification of immunotherapy-related subtypes, characterization of tumor microenvironment infiltration, and development of a prognostic signature in gastric carcinoma
Source: publisher site journal article supplement (doi:10.18632/aging.205968), 2024-06-25
Supplement: Supplementary file [file aging-v16i14-205968-supplementary-material-SD1.pdf]

## SUPPLEMENTARY TABLE

**Supplementary Table 1. Differentially expressed genes between the responder and non-responder groups.**

| <b>Gene symbol</b> | <b>Full name</b>                                            |
|--------------------|-------------------------------------------------------------|
| PRKCG              | protein kinase C gamma                                      |
| RCL1               | RNA terminal phosphate cyclase like 1                       |
| MAGED1             | MAGE family member D1                                       |
| HSBP1L1            | heat shock factor binding protein 1 like 1                  |
| FBLN1              | fibulin 1                                                   |
| GBP1P1             | guanylate binding protein 1 pseudogene 1                    |
| GBP4               | guanylate binding protein 4                                 |
| GBP5               | guanylate binding protein 5                                 |
| FASLG              | Fas ligand                                                  |
| GRIN1              | glutamate ionotropic receptor NMDA type subunit 1           |
| RAET1K             | retinoic acid early transcript 1K pseudogene                |
| RPL22L1            | ribosomal protein L22 like 1                                |
| WARS1              | tryptophanyl-tRNA synthetase 1                              |
| PDGFRA             | platelet derived growth factor receptor alpha               |
| TNFSF9             | TNF superfamily member 9                                    |
| ZNF232             | zinc finger protein 232                                     |
| TTC28              | tetratricopeptide repeat domain 28                          |
| OR2I1P             | olfactory receptor family 2 subfamily I member 1 pseudogene |
| CENPU              | centromere protein U                                        |
| LRRC42             | leucine rich repeat containing 42                           |
| LAP3               | leucine aminopeptidase 3                                    |
| JAKMIP1            | janus kinase and microtubule interacting protein 1          |
| VSNL1              | visinin like 1                                              |
| SKAP2              | src kinase associated phosphoprotein 2                      |
| CYSRT1             | cysteine rich tail 1                                        |
| USP43              | ubiquitin specific peptidase 43                             |
| NID1               | nidogen 1                                                   |
| CXCL11             | C-X-C motif chemokine ligand 11                             |
| UBE2L6             | ubiquitin conjugating enzyme E2 L6                          |
| PMAIP1             | phorbol-12-myristate-13-acetate-induced protein 1           |
| ZNF605             | zinc finger protein 605                                     |
| GNAI1              | G protein subunit alpha i1                                  |
| CXCR2P1            | C-X-C motif chemokine receptor 2 pseudogene 1               |
| EML1               | EMAP like 1                                                 |
| TEKT1              | tektin 1                                                    |
| IFNG               | interferon gamma                                            |
| GCHFR              | GTP cyclohydrolase I feedback regulator                     |
| PID1               | phosphotyrosine interaction domain containing 1             |
| SYCE2              | synaptonemal complex central element protein 2              |
| FAT4               | FAT atypical cadherin 4                                     |
| CD274              | CD274 molecule                                              |
| FZD3               | frizzled class receptor 3                                   |
| NDRG1              | N-myc downstream regulated 1                                |

|          |                                                            |
|----------|------------------------------------------------------------|
| BATF2    | basic leucine zipper ATF-like transcription factor 2       |
| SLC31A2  | solute carrier family 31 member 2                          |
| CXCL9    | C-X-C motif chemokine ligand 9                             |
| DCHS1    | dachsous cadherin-related 1                                |
| LGALS17A | galectin 14 pseudogene                                     |
| RTKN2    | rhotekin 2                                                 |
| CENPH    | centromere protein H                                       |
| CPQ      | carboxypeptidase Q                                         |
| FRMD5    | FERM domain containing 5                                   |
| IDO1     | indoleamine 2,3-dioxygenase 1                              |
| KDSR     | 3-ketodihydrosphingosine reductase                         |
| ELOVL3   | ELOVL fatty acid elongase 3                                |
| ARHGAP28 | Rho GTPase activating protein 28                           |
| SLCO2A1  | solute carrier organic anion transporter family member 2A1 |
| MMP2     | matrix metalloproteinase 2                                 |
| MPHOSPH6 | M-phase phosphoprotein 6                                   |
| DNAAF3   | dynein axonemal assembly factor 3                          |
| PRXL2A   | peroxiredoxin like 2A                                      |
| CXCL10   | C-X-C motif chemokine ligand 10                            |
| CADM4    | cell adhesion molecule 4                                   |

---
