# Supplementary material for: Identification of immunotherapy-related subtypes, characterization of tumor microenvironment infiltration, and development of a prognostic signature in gastric carcinoma
Source: publisher site journal article supplement (doi:10.18632/aging.205968), 2024-06-25
Supplement: Supplementary file [file aging-v16i14-205968-supplementary-material-SD4.pdf]

**Supplementary Table 4. KEGG pathway enrichment analysis of DEGs between two clusters.**

| <b>Term</b>                                                            | <b>Count</b> | <b>FDR</b> |
|------------------------------------------------------------------------|--------------|------------|
| hsa04512:ECM-receptor interaction                                      | 51           | 1.33E-20   |
| hsa04510:Focal adhesion                                                | 73           | 1.70E-15   |
| hsa04151:PI3K-Akt signaling pathway                                    | 95           | 4.90E-11   |
| hsa04514:Cell adhesion molecules                                       | 54           | 3.41E-10   |
| hsa05146:Amoebiasis                                                    | 41           | 5.81E-10   |
| hsa04974:Protein digestion and absorption                              | 41           | 6.96E-10   |
| hsa05144:Malaria                                                       | 27           | 8.93E-10   |
| hsa04610:Complement and coagulation cascades                           | 36           | 1.42E-09   |
| hsa05200:Pathways in cancer                                            | 120          | 3.12E-09   |
| hsa05414:Dilated cardiomyopathy                                        | 36           | 5.88E-08   |
| hsa04060:Cytokine-cytokine receptor interaction                        | 74           | 1.79E-07   |
| hsa05410:Hypertrophic cardiomyopathy                                   | 33           | 4.69E-07   |
| hsa05412:Arrhythmogenic right ventricular cardiomyopathy               | 30           | 4.69E-07   |
| hsa04020:Calcium signaling pathway                                     | 60           | 5.21E-06   |
| hsa04270:Vascular smooth muscle contraction                            | 40           | 5.87E-06   |
| hsa04640:Hematopoietic cell lineage                                    | 32           | 1.58E-05   |
| hsa05205:Proteoglycans in cancer                                       | 52           | 1.91E-05   |
| hsa04022:cGMP-PKG signaling pathway                                    | 44           | 4.79E-05   |
| hsa04933:AGE-RAGE signaling pathway in diabetic complications          | 31           | 5.36E-05   |
| hsa04360:Axon guidance                                                 | 46           | 8.23E-05   |
| hsa04611:Platelet activation                                           | 35           | 1.02E-04   |
| hsa05165:Human papillomavirus infection                                | 71           | 1.02E-04   |
| hsa04080:Neuroactive ligand-receptor interaction                       | 75           | 1.91E-04   |
| hsa04261:Adrenergic signaling in cardiomyocytes                        | 39           | 2.00E-04   |
| hsa04061:Viral protein interaction with cytokine and cytokine receptor | 29           | 3.55E-04   |
| hsa05418:Fluid shear stress and atherosclerosis                        | 36           | 4.51E-04   |
| hsa04015:Rap1 signaling pathway                                        | 47           | 0.00126    |
| hsa04921:Oxytocin signaling pathway                                    | 37           | 0.0017     |
| hsa04924:Renin secretion                                               | 21           | 0.002423   |
| hsa04010:MAPK signaling pathway                                        | 59           | 0.003256   |
| hsa04810:Regulation of actin cytoskeleton                              | 46           | 0.005231   |
| hsa05217:Basal cell carcinoma                                          | 19           | 0.005347   |
| hsa04062:Chemokine signaling pathway                                   | 41           | 0.008065   |
| hsa05202:Transcriptional misregulation in cancer                       | 41           | 0.008697   |
| hsa04340:Hedgehog signaling pathway                                    | 17           | 0.009668   |
| hsa04926:Relaxin signaling pathway                                     | 30           | 0.010632   |
| hsa04916:Melanogenesis                                                 | 25           | 0.011776   |
| hsa04371:Apelin signaling pathway                                      | 31           | 0.01651    |
| hsa04024:cAMP signaling pathway                                        | 44           | 0.018462   |
| hsa04540:Gap junction                                                  | 22           | 0.019733   |
| hsa04350:TGF-beta signaling pathway                                    | 23           | 0.020045   |
| hsa05150:Staphylococcus aureus infection                               | 23           | 0.025764   |
| hsa01521:EGFR tyrosine kinase inhibitor resistance                     | 20           | 0.026021   |
| hsa04713:Circadian entrainment                                         | 23           | 0.028093   |
| hsa04145:Phagosome                                                     | 32           | 0.029498   |

|                                              |    |          |
|----------------------------------------------|----|----------|
| hsa05222:Small cell lung cancer              | 22 | 0.029929 |
| hsa04925:Aldosterone synthesis and secretion | 23 | 0.029929 |
| hsa03320:PPAR signaling pathway              | 19 | 0.029929 |

---
